# Supplementary material for: VHH CDR-H3 conformation is determined by VH germline usage
Source: PubMed Central journal article supplement (PMC10439903; doi:10.1038/s42003-023-05241-y), 2023-08-19
Supplement: 42003_2023_5241_MOESM2_ESM.pdf [file 42003_2023_5241_MOESM2_ESM.pdf]

## **Description of Additional Supplementary Files**

**File name:** Supplementary Data 1

**Description:** The numeric data used to plot Figure 1-6 and PDB IDs used in the manuscript analysis.

**File name:** Supplementary Data 2

**Description:** The numeric data used to plot Supplementary Figure 1-10.
